# Supplementary material for: Evidence-based practice education for healthcare professions: an expert view
Source: PubMed Central journal article supplement — BMJ Evid Based Med. 2018 Nov 15;24(3):103–8. doi: 10.1136/bmjebm-2018-111019 (PMC6582731; doi:10.1136/bmjebm-2018-111019), 2018-11-15
Supplement: bmjebm-2018-111019supp001.pdf [file bmjebm-2018-111019supp001.pdf]

### **Appendix A – Interview guide**

1. What is the current practice nationally with regard to the teaching of EBP to healthcare professional students at university/professional level?
2. From your experience, what are the existing resources/initiatives/methods that are effective in helping to incorporate EBP into academic curricula and clinical education?
3. What are the key challenges of incorporating EBP into academic curricula and clinical education?
4. If you were developing a new EBP curriculum for healthcare professionals what would it include? (Note: with a particular focus on core competencies/entrustable professional activities and in the context of a clinical effectiveness agenda).
5. For future healthcare professional education programmes, what key resources /processes need to be developed / put in place to enhance EBP teaching and learning?
6. To finish, are there any further recommendations/ insights you wish to impart that would be useful in the context of study?

Thank you for taking the time to talk with us. It is sincerely appreciated.
